# Supplementary material for: Identification of Marine Biotechnology Value Chains with High Potential in the Northern Mediterranean Region
Source: Mar Drugs. 2023 Jul 22;21(7):416. doi: 10.3390/md21070416 (PMC10381324; doi:10.3390/md21070416)
Supplement: Supplementary file 1 [file marinedrugs-21-00416-s001.zip › Supplementary Table S1.xlsx]

## Sheet: BPs_MedOnly
	Name of the good practice	Developer(s) of good Practice	Developer(s) of good Practice (Med country participating)	Funding Sources	General idea of good Practice	Detailed/Full description	Category	Sector/Field of interest	Technology Readiness Level -TRL (1up to 9)	Intellectual Property Rights	Sources and related resources that have been developed
1	Biotehnological potential of selected microorganisms from Sečovlje Saltpans for application in cosmetics products	National Institute of Biology (NIB)	Slovenia	National	Develop the procedure to enhance the production of the known and novel compounds of high biotechnological value from selected microorganisms in Sečovlje Saltpans to be used as ingredients in cosmetic products.	Specific objectives are: (1) Assessment of microbial biodiversity of Sečovlje saltpans to provide basis for future work on characterization of species with biotechnological potential; (2) Optimization of microbial growth of the selected microorganisms (mostly microalgae) and optimized biosynthesis of selected compounds, including operation of small- and pilot-scale cultivation ponds and biomass h…	Collaborative Innovation- Networking- Clusters- Knowledge Platforms	Cosmetics	5.Technology validated in relevant environment		Document/literature review
2	Wastewater Treatment using algae	AlgEn (SLOVENIA) Private company	Slovenia	Private and EU	Contribution to development of blue economy: Sustainable bioremediation solutions for industrial, agricultural and municipal wastewater treatment	Combined algal and bacterial treatment solutions provide many advantages, such as: in-situ use of solar energy, substantially lower operational cost (aeration), substantially better heavy metal removal with possible recuperation, better energy and mass efficiency, lower GHG emissions (negative CO2 balance), no need for tertiary polishing, useful and valuable biomass and innovative technology. Con…	Technology transfer	Environment	6. Technology demonstrated in relevant environment		Document/literature review
3	Biogas Digestate Treatment (AlgeBioGas)	AlgEn (SLOVENIA) Private company	Slovenia	Private and EU	Contribution to development of blue economy: Using biogas digestate for growing microalgae.	Algal treatment of biogas digestate is an innovative approach for biogas plants in search of improved quality of digestate liquid fraction, energetic substrates (feedstock), recycling CO2 emissions, effectively use of excess heat and reduction of odour. Nutrients from digestate can be recovered and cycled on site. By algal treatment of biogas digestate, quality of digestate liquid fraction (liquo…	Technology transfer	Environment	7. System prototype demonstration in operational environment		Document/literature review
4	Photorespirometer project	AlgEn (SLOVENIA) Private company	Slovenia	National and EU	Contribution to development of blue economy: Inovative solution for measurment of biodegradability of plastics	Aim: to develope photorespirometer which is able to measure biodegradability of plastics and effect of plastic in marine environments. For that purpuse, cultures using marine organisms, including algae, will be used and standarized. Challenges/needs adressed: plastics pollution. Impact and usefulness: additional tools for mitigating plastics polution in the marine environment. Contribution to inn…	Technology transfer	Environment			Document/literature review
5	Innovative metallization of polymers	Augmentech -(Slovenia) Private company	Slovenia	EU	Contribution to development of blue economy: Novel and disruptive technology that uses algae for the metallization of polymers. This process will allow a sustainable and more competitive metallization process.	Description: Some microalgae under special conditions (e.g. anaerobic conditions in sulfur-depleted culture medium) possess strong reductive capacity that can be used to reduce metal salts and deposit metals as layers on a substrate surface (polymer). These conditions can be achieved in bioreactors. By the addition of »metabolic boosters« and/or the selection of special algae strains it is possib…	Technology transfer	Environment	2.Technology concept formulated		Document/literature review
								Industrial processes: enzymes, catalizers etc
6	BioApp A trans-regional platform for the transfer of technological biopolymers from the research sector to the market	International consortium Partner from Slovenia - National Institute of Chemistry	Slovenia	EU	Contribution to development of blue economy: A trans-regional platform for the transfer of technological biopolymers from the research sector to the market	Description: Project BioApp strengthened cooperation and increased interconnection between key stakeholders involved in the development of bio-polymer innovations, both from the public and private sectors within the program area, through their direct involvement in the pilot development of bio-polymer technologies. By established trans-regional technological platform, this project BioApp provided…	Collaborative Innovation- Networking- Clusters- Knowledge Platforms	Environment			Document/literature review
								Nutraceuticals
7	BIOECO-R.D.I. BIO-ECOnomy Research Driven Innovation	International consortium Partner from Slovenia - National Institute of Chemistry	Slovenia	EU	Contribution to development of blue economy: investigation of potential of biomass from agricultural, fisheries and forestry waste and residues	Description: The ADRION region has relevant unexploited potential of biomass from agricultural, fisheries and forestry waste and residues. The enterprises operating in such sectors are suffering serious delays in the green reconversion, multi-functioning, technology innovation, cross-sectoral integration. Aim: to develop a Regional Innovation System for the Adriatic-Ionian area based on a structu…	Collaborative Innovation- Networking- Clusters- Knowledge Platforms	Environment			Document/literature review
								Aquaculture
								Energy
								Feed Industry
8	Marine management plan	Ministry of the Environment and Spatial Planning Public authority	Slovenia	National	Contribution to development of blue economy: strategy on sea monitoring and management of sea resources	Description: national strategy on monitoring of sea enviroment and use of marine resources. Document describes in details what is understood as a good state of sea and how it should be protected. This document ensures maintainance of at least current state of sea enviroment and sustainable use of marine resources. Aim: ensuring good state of sea and sustainable use of marine resources. Challenges…	Strategies and Policy Management	Aquaculture			Document/literature review
								Environment
9	Jellyfish biomass for feed	National Institute of Biology (NIB)	Slovenia		Contribution to development of blue economy: investigation of jellyfish as a source to make feed		Technology transfer	Feed Industry	3. Experimental proof of concept		Document/literature review
								Environment
10	Ocean4Biotech European transdisciplinary networking platform for marine biotechnology	International consortium Partner from Slovenia - National Institute of Biology (NIB)	Croatia, France, Greece, Italy, Montenegro, Portugal, Slovenia, Spain	EU	Contribution to development of blue economy: creation of efficient, operational, motivated, inclusive and sustainable network with a serious and ambitious commitment for proactive dissemination and science communication activities.	Description: Marine organisms produce a vast diversity of primary and secondary metabolites with antibacterial, antifungal, anticancer, analgesic, anti-inflammatory, nutritional, photoprotective activity or other beneficial properties. The exploitation of marine bioresources and the valorisation of their natural products are encompassed by the burgeoning field of marine biotechnology, which is a …	Collaborative Innovation- Networking- Clusters- Knowledge Platforms	All sectors			Document/literature review
11	Vanguard Use of national smart specialisation strategy	International innitiative Slovenia is a part of it.	France, Italy, Portugal, Slovenia, Spain	International/EU	Contribution to development of blue economy: The Vanguard Initiative new growth through smart specialisation is driven by a political commitment made by regions to use their smart specialisation strategy to boost new growth through bottom-up entrepreneurial innovation and industrial renewal in European priority areas.	Description: This Vanguard Initiative has its foundations at the regional level. EU regions are the closest policy link to the bottom-up growth dynamics necessary for the renewal of our industrial fabric through their proximity to innovative partnerships and clusters. Such partnerships and clusters form eco-systems that are the catalyst for fast-growing innovative SMEs. Regional innovation ecosys…	Strategies and Policy Management	All sectors			Document/literature review
12	SRIP – Circular economy Networks for the transition into circular economy	Republic of Slovenia	Slovenia	National	Contribution to development of blue economy: promotion of cooperation in the fiels of circular economy	Description: SRIP – Circular economy is a connection of Slovenian business subjects, educational and research institutions (RRI), non-governmental organisations and other interested parties, in collaboration with the state, into new value chains according to the economic principles of closed material flows. Aim: to increase the efficiency and competitiveness of the domestic economy in the transit…	Collaborative Innovation- Networking- Clusters- Knowledge Platforms	All sectors			Document/literature review
13	ALGADISK Novel algae-based solution for CO2 capture and biomass production	AlgEn Private company	Slovenia	EU	Contribution to development of blue ecnomy: promotion of cooperation in the fiels of circular economy	Description: Microalgae can provide an alternative source of protein for animals and humans and also help to reduce carbon dioxide (CO2) from the atmosphere. An EU-funded initiative investigated the best ways of producing microalgae for CO2 capture and biomass production. Aim: to develop a modular, scalable and automated biofilm reactor to produce algal biomass. Besides being commercially viable,…	Technology transfer	Environment	5.Technology validated in relevant environment		Document/literature review
								Energy
14	FISH-AGRO-TECH Agriculture/Fisheries: Cross-border investment and innovation	International consortium Partner from Slovenia - National Institute of Biology (NIB)	Italy, Slovenia	EU	Contribution to development of blue economy: creation of the partnerships between scientific community and business.	Description: Project focuses on the creation of the joint partnerships between the parks and the scientific/technological institutions and business communities of the cross-border territory belonging to the agro-food, fisheries, and aquaculture sectors, by involving the local and coastal action Groups (LAG and FLAG). Aim: to adopt an open innovation and CLLD approach for transferring the research…	Collaborative Innovation- Networking- Clusters- Knowledge Platforms	Aquaculture			Document/literature review
								Nutraceuticals
15	TASTE The Application of Edible Seaweed for Taste Enhancement and Salt Replacement	International consortium. Partner from Slovenia - Frutarom Etol tovarna arom in eteričnih olj d.o.o. Private company	France, Slovenia, Spain	EU	Contribution to development of blue economy: the Application of Edible Seaweed for Taste Enhancement and Salt Replacement	Description: Seaweeds have a naturally salty taste being abundant in minerals like potassium and magnesium besides sodium. This salty taste improves the flavour profile of foodstuffs. In addition, some seaweeds contain a range of potential flavour components that can naturally enhance the flavour of the food. In particular, the proteinaceous compounds that are present in the seaweeds may be respo…	Technology transfer	Nutraceuticals	4. Technology validated in lab		Document/literature review
16	GoJelly A gelatinous solution to plastic pollution	International consortium Partner from Slovenia - National Institute of Biology (NIB)	Italy, Portugal, Slovenia	EU	Contribution to development of blue economy: possibility to use jellyfish for mitigation of microplastic pollution, as well as a material to be used for feed, food, cosmetics.	Description: Within GoJelly we will develop, test and promote a gelatinous solution to microplastic pollution by developing a TRL 5-6 prototype microplastics filter made of jellyfish mucus. We will therefore address two environmental issues: commercially and ecologically destructive sea and coastal pollution of both jellyfish and microplastics. Aim: to investigate possibility to use biomass of je…	Technology transfer	Cosmetics	4.Technology validated in lab	some partners submitted patent applications	Document/literature review
								Nutraceuticals
								Feed Industry
								Environment
17	ECONYL® Regenarated Nylon	AQUAFIL -Private Company	Slovenia	Private	Contribution to development of Blue Economy: practical application of recycled material	Description: With the ECONYL® regeneration system came a supply chain revolution that motivated waste recovery efforts all around the world. In 2013, the Healthy Seas initiative was founded by Aquafil in partnership with a separate NGO. The organization is dedicated to recovering abandoned fishing nets from the world’s oceans with volunteer divers. The nets are then regenerated into ECONYL® yarn.…	Marketing-Branding	Environment	9. Actual system proven in operational environment	Yes	Document/literature review
18	Mar3BIO- Biorefinery and biotechnological exploitation of marine biomasses	International consortium Partner from Slovenia - National Institute of Chemistry	Italy, Slovenia	EU	Contribution to development of blue economy: development of efficient and sustainable biorefinery processes	Description: The marine biomasses to be used in Mar3Bio are brown algae and crustacean byproducts. These abundant but underexploited renewable biomasses have great potential for production of high value biomolecules.The current bottlenecks for a bio-refinery focusing on raw materials as brown algae and crustacean byproducts, are low yields, high energy consumption and incomplete spectrum of recov…	Technology transfer	Environment
								Energy
19	Adding value to by-products generated by fisheries. The company COPALIS	COPALIS (France)	France		Pioneer company in the production and distribution of natural marine active ingredients for the nutraceutical, functional food, animal feed and cosmetics markets.	Copalis ia a leading company at Boulogne-sur-Mer in northern France aiming to add value to by-products generated by fisheries. What began as a smelly by-product reduction plant has become a world class by-product producer for one of Europe’s leading fish processing ports (see: https://en.copalis.fr/)	Technology transfer	Cosmetics	9. Actual system proven in operational environment	Yes	https://en.copalis.fr/
								Nutraceuticals
								Feed Industry
20	The Greek Spirulina	ALGAE SA -Nigrita (Greece)	Greece	EU-Leader	Production and utilisation of Spirulina as an entirely herbal and natural product	The company invested in the production of Spirulina platensis, in stainless steel tanks in greenhouses, at an area which combines all the basic elements of the environment in which the blue-green algae flourish. A completely natural way of drying the coil (sun’s rays) is used allowing Bio-Spirulina to preserve all its valuable vitamins and trace elements. Bio-Spirulina Algae is an absolutely orga…	Technology transfer	Aquaculture	9. Actual system proven in operational environment	Yes	https://www.spirulina.gr/
								Nutraceuticals
21	Algae for the Cosmetic and Aquaculture Industry Algae 4B-A	Agricultural University of Greece, APIVITA (Greece)	France, Greece,Portugal, Spain	EU H2020	Algae4B-A exploits the microalgae diversity, as a source for state-of-the art high-added-value biomolecules relevant for aquaculture and cosmetics	Basic and applied multidisciplinary research in the fields of –omics technologies, biochemistry and applied biotechnology in order to develop and optimize: low input and application-based microalgae culture systems. -Develop of “-omic” resources for microalgae. - Downstream processing of high value added products from microalgae, with an emphasis on polysaccharides, proteins, enzymes, antioxidant…	Technological support	Cosmetics	9. Actual system proven in operational environment		https://www.algae4BA-eu
								Aquaculture
								Nutraceuticals
								Feed Industry
22	Beach Waste -Natural products	PHEE- Greece	Greece	start up company	PHEE is harnessing the dead leaf of the vascular sea plant Posidonia oceanica, washed up in abundance on the Mediterranean shores and utilize them as a primary raw material.	PHEE-board is a highly aesthetic cellulose-based material that can be used to develop high value-added products. More specifically, developed through a patented process that described above PHEE-board is a flat panel made from Posidonia Oceanica and biological resins. PHEE creatse products that won’t only be competitive in the market but will also have a positive impact on the planet’s ecosystem.…	Business creation	Other (various industries furniture, accessories, packaging etc.)	9. Actual system proven in operational environment	Yes	https://phee.gr
23	Microalgae cosmeceuticals and nutraceuticals (AlgaeCeuticals)	Agricultural University of Athens, CERTH (Greece), BIONOS (Spain)	Croatia, Greece, Italy, Spain	EU	Microalgae biomass is used as a rich source of compounds for the development of natural UV Suncsreens and Proteins as cosmeceuticals and nutraceuticals	The AlgaeCeuticals project takes advantage of the native algae strains producing high added value products and through the application of novel omics technologies (genomics, transcriptomics, proteomics, enzymomics and metabolomics) as well as algae culture technologies and production of novel products. AlgaeCeuticals screens and characterizes algae biodiversity, develops and optimizes algae cultu…	Technology transfer	Aquaculture	6. Technology demonstrated in relevant environment		https://www.algaeceuticals.gr/
								Cosmetics
								Nutraceuticals
24	ALGAETEC Biobase Business Park	Portugal	Portugal		ALGATEC is an Eco Business Park designed to welcome entrepreneurial companies and projects in the algae and microalgae sector. It is the result of a partnership between:A4F - Algafuel S.A., Green Aqua Póvoa, S.A., Solvay S.A	The ALGATEC ECO BUSINESS PARK takes advantage of an excellent geographical location in Europe, as well as the availability of raw-materials, to welcome microalgae projects, promoting the innovation and the sustainable economic development, based on synergies between the promoters and the industrial surroundings. The mission of ALGATEC ECO BUSINESS PARK is to support entrepreneurs and investors in…	Technological Support	Aquaculture	9. Actual system proven in operational environment		https://algatec.eu/en/
25	Algae Biorefineries for Europe - D FACTORY	Spain, Israel (Production locations) Netherlands (Biomass harvesting)	Greece, Italy, Portugal, Spain	EU-FP7	D-factory is a R&D project aiming to grow, bio-refine and commercialise components developed from a unique species of algae, Dunaliella, as a modern sustainable biorefinery	Dunaliela cultivated and properly handled and extracted, it can be used to create a high-value material, called 9-cis-β carotene. This specific type of carotene has a range of applications, the most and value-generating one being its pharmaceutical and medical uses. 9-cis-β-carotene has the potential to cure patients with eye diseases and skin conditions like psoriasis.By products can also be com…	Technological support	Aquaculture	6. Technology demonstrated in relevant environment		www.d-factoryalgae.eu https://www.sciencedirect.com/science/article/pii/S2211926420301132
								Feed Industry
								Nutraceuticals
26	Jellyfish cosmetics	Korea Cosmeto-Nature (France)	France		Jellyfish contain collagen, fibrillin and hyaluronic acid and we can take advantage of these ingedients in order to produce a series of cosmetical products.	Jellyfish discloses a cosmetic composition for antioxidant, anti-inflammatory, whitening, and wrinkle improvement containing jellyfish collagen hydrolyzate as an active ingredient and a green fluorescent protein. The French company Cosmeto-Nature uses Jellyfish Venom Essence to produce gel/cream for cosmetics	Technology transfer	Cosmetics	9.Actual system proven in operational environment	Yes	https://www.cosmeto-nature.com/en/anti-aging/207-jellyfish-venom-gelcream-jellyfish-venom-essence-8430830508018.html
27	Blue Career Center	Project Mentor (Cyprus)	Greece	EASME-EMMF	The Blue Career Center of Eastern Mediterranean and Black Sea, seeks to provide prospects for young jobseekers in Blue Gbrowth sectors to support businesses in finding the right staff with proper qualifications.	The Blue Carrer Center aims to attract higher education graduates or persons with a vocational/technical qualification to maritime professions through targeted and innovative education and/or training initiatives (including career guidance); Retrain and up-skill workers employed in other sectors and/or people currently unemployed for a job in the blue economy; Diversify and expand the skills of p…	OTHER -Training - Access to jobs	All sectors			http://www.bluecareers.org/
28	Entrepreneurship support facility for Blue Growth - BLUE LAB	Municipality of Piraeus - Greece	Greece	Regional Operational Programme of Attica 2014-2020/ European Regional Development Fund (ERDF)	Located at the main port of Greece (Piraeus), ,the Entrepreneurship support facility for Blue Growth "BLUE LAB" offers to inspired entrepreneurs business consultation, access to a wide network of marine and maritime professions and technological support, including training courses and infrastructure such as 3d printers, to enable prototypes to be designed.	Blue Lab is a modern and technologically advanced space that welcomes young entrepreneurs who want to develop technological and business skills, through a series of services. In Blue Lab of the Municipality of Piraeus people have the opportunity to be fully supported for the implementation of their business ideas, to be educated and to experiment on key enabling technologies, such as 3D printing,…	Collaborative Innovation- Networking- Clusters- Knowledge Platforms	Environment			Desktop research: BLUE LAB (https://www.bluelab.gr/; http://oxe.pireasnet.gr/)Communication with the relevant body
29	Production of spirulin for food consumption	ApuliaKundi Italy	Italy	Apulia Region (start up)	Cultivation of the cyanobaterium Spirulina for the preparation of several types of functional foods and integrators for human consumption	Spirulina (Arthrospira platensis) is a cyanobacterium known for its extraordinary content in nutrient compound, and also known as a "superfood" or "food of the future". Moreover, the production of spirulina is highly sustainable since this alga utilizes CO2 to grow, and it thus sustains the reduction of carbon dioxide in the atmosphere. Apulia Kundi also provides support services to innovation an…	Business creation	Aquaculture	9. Actual system proven in operational environment		A webpage (https://www.apuliakundi.it/) and an illustrative brochure (https://www.apuliakundi.it/wp-content/uploads/2020/11/ApuliaKundi_Brochure_new_2020_web-1.pdf)
								Nutraceuticals
30	Use of marine algae for biofertilizer and biostimuating products for organic agriculture	SouthAgro Italy	Italy		Use of marine macroalgae for the production of biostimulants and biofertilizers for organic agriculture (for professional use and for hobby purposes); development of a system of propagation and cultivation of marine algae for their transformation and use in organic agriculture	South Agro is a start-up located in Taranto (Apulia, Italy) and it develops, produces and commercializes biostimulants and biofertilizers for organic agriculture starting from marine algae. These products allow plants to enhance their defenses to climatic stress and to fight diseases in a sustainable way. Products by South Agro are both intended for professional use and for hobby purposes. Some o…	Technology transfer	Aquaculture	9. Actual system proven in operational environment		A webpage illustrating the startup, the scientific background of their production, and the products and purposes realized https://southagro.com/
								Environment
31	Use of fish skin as substitute of leather in fashion products	Project "Skin Fish" (Society Blue Marine Fish, Italy)	Italy	Italian Ministry of Agricultural and Forestry Policies	Use of skin fish from the Italian market as raw material in alternative sectors such fashion, including clothes, footwear, bags production as substitute of leather.	The project has deal with the evaluation and testing of skin fish from the Italian market as raw material in alternative sectors such fashion, including clothes, footwear, bags production as substitute of leather. The project identified the most promising fish species to this aim, defined technical and operational details to obtain skin fish able to be tanned, and involved several small-scale com…	Technological support	Aquaculture	7. System prototype demonstration in operational environment		http://www.blumarineservice.it/it/progetto-skin-fish
								Other (clothes, footwear, bags)
32	Use of shells from mussel farm to produce carbonate-rich feeding for poultry farming	Gargano Shell Fish Farm (Manfredonia, Apulia Region, Italy)	Italy	Own sources	Production of carbonate-rich powder from shells produced in mussel culture to be used as additives in feedings intended for poultry an livestock industries	Shells represent an important fraction of wastes in shelfish farming and an impacting fraction of biofouling organisms in fish farm structures. As the production and processing of bivalves has increased, efficient use of their shells has become important, not only to maximize financial return, but also to address waste disposal problems because of their slow natural degradation rate. Due to their…	Technology transfer	Aquaculture	5. Technology validated in relevant environment	Yes	Website, video, press release soon available online
								Feed Industry
								Environment
33	Blue Italian Growth National Technological Cluster (CTN BIG Cluster) - Cluster approach to Blue Growth	Cluster BIG - Italian Ministry of Education, University and Research (MIUR)	Italy	BIG is one of 12 National Technological Clusters (Cluster Tecnologici Nazionali) that will develop the 12 Specialisation Areas which have been identified by the Italian National Programme for Research (PNR) 2015-2020, and by the Italian National Intelligent Specialisation Strategy (SNSI).	Clustering is an efficient tool to create cooperation among enterprises and institutions operating in the same area to improve productivity, innovation and competitiveness of national industry in the international market.	Clustering has been described as "an effective instrument for strengthening the competitiveness of enterprises and their ability to produce and market goods and services that will generate revenues in the domestic and international markets" (https://ariel.adrioninterreg.eu). Clustering relies on a stable cooperation among enterprises and institutions operating in the same area and facing the same…	Collaborative Innovation- Networking- Clusters- Knowledge Platforms	All sectors			http://www.clusterbig.it/ About Cluster Approach: https://ec.europa.eu/growth/smes/cosme_en; https://ec.europa.eu/regional_policy/en/funding/erdf/; https://www.unido.org/; https://ec.europa.eu/regional_policy/en/funding/ipa/; https://www.eib.org/en/index.htm; http://www.wbedif.eu/about-wbedif/
34	Blue Bio Value - Acceleration Programme	Oceano Azul Foundation and the Calouste Gulbenkian Foundation in collaboration with Fábrica de Startups and Bluebio Alliance	Portugal	Own resources	Blue Bio Value business accelerator aims to multiply business opportunities along the value chain of marine bio resources, including marine biotechnology, and sustainable development of products or services whose exploitation can contribute to a healthier use of the ocean.	Blue Bio Value is a business program dedicated to bringing ocean-based, sustainable solutions to a new, blue bioeconomy. It scales up marine biobased projects to global market applications in different industries, fostering science-based and biotech innovations, while helping to design a better world. Since its launch in 2018, Blue Bio Value has accelerated a total of 28 companies from 15 differe…	Business creation	All sectors			https://www.bluebiovalue.pt/
35	Blue Innovation Hub	Patras Science Park -Greece	Greece		Blue Innovation HUB is a joint initiative of leading academic research labs and Patras Science Park with the aim to exploit research results and promote innovation, new product development and business partnerships in the field of blue growth.	The primary objective of the HUB is to consolidate, foster and coordinate community activities towards the development of products and applications based on blue growth, thus creating for its members new perspectives for research, technological and entrepreneurial cooperations.Specifically: Creation of conditions to attract new scientists, development centers, business; Strong bonds between labs …	Collaborative Innovation- Networking- Clusters- Knowledge Platforms	All sectors			https://www.psp.org.gr/main-activities/innovation-hubs/blue-innovation-hub/
36	Blue Innovation Voucher Scheme	Blue Boost - lead partner Croatian Camber of Economy	Croatia, Greece, Italy	EU Interreg Adrion Program	Use of transnational innovation vouchers as an innovative funding tool to boost innovation and transnational/cross-sectoral cooperation development of Blue sectors	Transnational innovation voucher pilot action has been tested within the Blue-Boost project as an innovative tool to fund innovation and transnational/cross-sectoral cooperation development of Blue sectors. Blue-Boost has launched a dedicated call for transnational innovation vouchers having the goal to help MSMEs to design and/or create, through small innovation projects, new products, services,…	Funding mechanisms	All sectors			A project website https://blueboost.adrioninterreg.eu/ including a library (https://blueboost.adrioninterreg.eu/library) with further information on Innovation Vouchers
37	Bio-based Industries Joint Undertaking (BBI JU) - Public-Private Partnership	EU and the Bio-based Industries Consortium (BIC).	Croatia, France, Italy, Portugal, Spain	EU/ H2020	BBI JU is a €3.7 billion initiative providing funding for projects in the bio-based industries sector for the 2014-2020 period.	The Bio-based Industries Joint Undertaking (BBI JU) is a €3.7 billion Public-Private Partnership between the European Union and the Bio-based Industries Consortium (BIC). Until today, BBI JU has funded 123 bio-based innovation projects involving 924 beneficiaries from 37 EU Member States and Associated Countries.	Funding mechanisms	All sectors			https://www.bbi-europe.eu/
38	Blue Crowdfunding	Blue Crowdfunding Project (Interreg MED), Lead Partner E-Zavod	Croatia, Greece, Italy, Portugal, Slovenia, Spain	INTERREG MED	Blue economy innovation in Mediterranean could be significantly improved, if more investment funds would be available.One possible solution is use of crowdfunding (CF), but knowledge and capacities for CF are still low in MED area . Project general objective is to improve innovation capacities in blue growth sector by mainstreaming use of crowdfunding. Project ambition is to trigger change from u…	BLUE CROWDFUNDING is an Interreg MED Project aiming at spreading information and knowledge about crowdfunding as such and as applied to blue economy, in order to make it more accessible to the stakeholders involved. As a matter of fact, blue economy innovation in Mediterranean could be significantly improved, if more investment funds would be available. One possible solution is use of Crowdfundin…	Funding mechanisms	All sectors			https://blue-crowdfunding.interreg-med.eu/
39	ERA-MarineBiotech	Marine Biotechnology ERA-NET	France, Italy, Portugal, Slovenia, Spain	EU	Funded under the FP7 ERA-NET scheme, ERA-MarineBiotech is a consortium of national funding bodies seeking complementarities between national activities to pool resources to undertake joint funding of transnational projects in the area of Marine Biotechnology.	The Marine Biotechnology ERA-NET (ERA-MarineBiotech) is designed to deliver better coordination of relevant national and regional Research, Technology, Development and Innovation (RTDI) programmes in Europe, reducing fragmentation and duplication, and paving the way for common programmes and cooperation in the provision and use of research infrastructures. ERA-MarineBiotech's 19 partners from 14 …	Strategies and Policy Management	All sectors			http://www.marinebiotech.eu/
40	Intergrated multitrophic aquaculture for bioremediation and exploitation of edible and non-edible by-products	RemediaLIFE consortium (University of Salento, Apulia region, Italy)	Italy	UE (LIFE project)	Use of Integrated Multi-Trophic Aquaculture (IMTA) approach with polychaetes, sponges, mussels and macroalgae to bioremediate the aquaculture environment and exploitation of the produced edible and non-edible biomass for other (bio)technological applications; promotion of this approach at the European market level.	The project is applying an IMTA approach, which uses, for the first time in Europe, a combined use of bioremediating organisms (polychaetes and sponges, which are more efficient than mussels alone in removing waste suspended material and bacteria), mussels and macroalgae (more "classical" organisms used in IMTA, the latter also contributing in the removal of phosphorus and nitrogen). This communi…	Technological support	Aquaculture	3. Experimental proof of concept		A webpage with detailed information on the project, partners, dissemination activities https://remedialife.eu/
								Environment
41	Microalgae-based biorefinery for products to be used in agriculture and aquaculture	SABANA project (Sustainable integrated algae biorefinery for the production of bioactive compounds for agriculture and aquaculture) (coordinated by University of Almeira, Spain)	Italy, Spain	EU/ H2020	Large-scale integrated microalgae-based biorefinery for the production of biostimulants, biopesticides and feed additives, in addition to biofertilizers and aquafeed, using only marine water and nutrients from wastewaters	The SABANA Project envisages the development of a large-scale biorefinery based on an integrated microalgae system for the production of biostimulants and biopesticides in agriculture and feed and additives in aquaculture using sea water and nutrients from agro-zootechnical waste. The objective is to obtain a ZERO-waste process at an industrial scale of up to 5 ha, which is sustainable both from …	Technological support	Aquaculture	4. Technology validated in lab		A project website including a page with documents produced http://eu-sabana.eu/
								Environment
42	Sponge mariculture for bioremediation and production of valuable compounds in polyculture systems (AsMar)	Italy - Gargano Shell Fish Farm (company) -University of Bari Aldo Moro - Biology Department - Institutional actor: Apulia Region	Italy	Interreg ADRION Blue_Boost	Use of sponge mariculture to provide positive outcome on bioremediation, animal welfare and diversification of aquaculture production and processes. Porifera have significant commercial potential: in the cosmetic sector (bath sponges), as natural reserve of bioactive compounds, as well as in aquarism. The BBt/value chains addressed are: sustainable integrated multi-trophic aquaculture (IMTA).	Aim of the best practice is to test the survival and growth of different species of sponges in the vicinity of off-shore mariculture cages in the Gulf of Manfredonia, Italy, to improve water quality and diversify the production by implementing a marine circular economy process. In proximity to fish farms the release of metabolic by-products, food residues, faecal material and possibly drugs can l…	Technological support	Aquaculture	4. Technology validated in lab	Yes	Literature review sources: https://www.arti.puglia.it/articolo-progetto/i-vincitori-dei-voucher-blue-boost-asmar; https://www.google.it/url?sa=t&rct=j&q=&esrc=s&source=web&cd=&cad=rja&uact=8&ved=2ahUKEwjH5vf4j_HtAhXUasAKHfDUA5AQFjAFegQIBxAC&url=http%3A%2F%2Fwww.aquafarm.show%2Fwp-content%2Fuploads%2F2018%2F04%2FCariglia-Michela-e-Longo-Caterina.pdf&usg=AOvVaw2qWu5qHVM1vyWoDuHcFf7w; https://www.yo…
								Environment
								Cosmetics
								Nutraceuticals
43	Production and use of Salicornia spp. for halting coastal erosion and food production	Italy	Italy	Own sources	Cultivation of the halofite plants Salicornia spp. on marginal lands (i.e. coastal marshes characterized by high salinity) for food production, as a plant bio filter of marine aquaculture effluents or as viable source of biofuel for aviation	The Salicornia/Glasswort is spread at worl level.The project is based on the identification of S. areas cultivation for coastal erosion prevention and bioremediation, standardization of sustainable harvesting and processing flow of extraction of bioactive compounds from Salicornia/Glasswort both from raw and waste for three main pathways: functional food, nutraceutical and feed for aquaculture. T…	Technological support	Nutraceuticals	5.Technology validated in relevant environment		https://biodiversitapuglia.it/la-savsodde-si-coltiva-nellarea-garganica/; https://link.springer.com/article/10.1007/s10722-017-0521-5; https://www.sciencedirect.com/science/article/abs/pii/S0098847212001736?casa_token=MnjH2bCijGQAAAAA:hqAkrsuARxNAVoI-UM5N3rB7rNC9Xjgu8MPyC78odR6mqhRTExa4tuH3MhmpOgraiLSsIRph; https://www.pesceinrete.com/settore-ittico-bellanova-a-manfredonia-focus-su-semplificazion…
								Feed Industry
								Environment
44	Industrial Resource Efficiency in European Mariculture IDREEM	Scottish Association for Marine Science (SAMS) and14 industrial and research partners from across Europe	Italy	EU/FP7	Support the European aquaculture industry to adopt more environmentally and economically efficient practices using IMTA on a commercial scale.	IDREEM has developed models to assess the environmental impacts for aquatic species, both as monoculture and in combination in IMTA.The use of models plays an integral part in the development of aquaculture, to understand growth and environmental impacts, to evaluate overall carrying capacity, and to improve selection of aquaculture sites.	Technological support	Aquaculture	8. System complete and qualified		http://www.idreem.eu/cms/2016/09/30/key-outcomes-idreem-project-presented-aquaculture-europe-2016/
45	Tools for Assessment and Planning of Aquaculture Sustainability TAPAS	UK and international consortium	Greece, Spain	EU/H2020	Support the planning and licensing of aquaculture in Europe by an Aquaculture Toolbox containing tools, approaches and frameworks	TAPAS Aquaculture Sustainability Toolbox incorporates existing and newly developed models and approaches. In recognition of the need for a multi-stakeholder approach to aquaculture sustainability, the Aquaculture Toolbox was created to aid planners and license applicants in guiding and developing the industry and their operations. In particular the toolbox contains: • regulatory frameworks for ad…	Technological support	Aquaculture	8. System complete and qualified		http://tapas-h2020.eu/
46	Valuable Products from Algae Using new Magnetic Cultivation and Extraction Techniques VALUEMAG	National Technical University Of Athens (Greece) and 11 projects partners (including ENEA – Italy)	France, Greece, Italy	EU/H2020	Support new solutions for microalgae cultivation and harvesting in order to produce and purify high-value biomolecules in an affordable and environmentally-friendly manner	VALUEMAG developed a new and advanced magnetic method for micro-algae cultivation. Moreover, the implementation of this knowledge in focus on several fields such as the use of micro-algae for food, cosmetic and nutraceutical products. A new innovative methodology based on the use of magnetic nanoparticles and a soft magnetic steel cone, issue of technologic engineering research, to cultivate alga…	Technological support	Nutraceuticals			www.valuemag.eu
								Feed Industry
								Cosmetics
47	Biomolecular and energetic enhancement of residual biomass in the agrindustrial sector BIO4BIO	Italy	Italy	National	Support the development of integrated enhancement processes starting from the production waste of the agroindustrial and fish sectors	BIO4BIO developed a system for processing agro-industrial and fish wastes in new products for the functional food industry or animal feed in line with the biochemical characteristics of the wastes. An innovative low power consumption drying system able to dry the organic matrix and use it in the feed production for the zootechnical industry or for the production of pectin, an essential element in…	Technological support	Feed Industry	7. System prototype demonstration in operational environment	Yes	http://www.agrobiopesca.it/bio4bio.php
								Environment
								Energy
48	Development of biosoluble microalgae extracts with regenerating activity on the skin tissues	Italy	Italy	National	Support the use of fish sector wastes , as skin fish, for application in clothing, footwear, objects design sectors	The microalgae selection process took into account their cosmetic value and the feasibility for the large scale cultivation . The algae extracts of Botryococcus braunii had a good potential for inducing cell-line differentiation, for stimulating collagen synthesis and for moisturising skin and good anti-oxidant and anti-inflammatory activities. Galdieria sulphuraria extract has shown a significan…	Technological support	Cosmetics	8. System complete and qualified		http://www.blumarineservice.it/en/progetto-skin-fish
49	Convention on Biological Diversity	United Nations	Croatia, France, Greece, Italy, Montenegro, Portugal, Slovenia, Spain	UN Environment Programme	Promote sustainable development and facilitate access to technology transfer among partners	The Convention has been signed by 150 governments leaders during the 1992 Rio Earth Summit. It is dedicated to promoting sustainable development, and conceived as a practical tool for translating the principales of Agenda 21 into concrete actions. It promotes biological diversity, nature and human well-being. The Convention highlights the need for "transfer of biotechnology equipment and know-how…	Strategies and Policy Management	All sectors	NA		https://www.cbd.int/doc/publications/cbd-sustain-en.pdf
50	Nagoya protocol on access to genetic resources and the fair and equitable sharing of benefits arising from their utilisation to the convention on biological diversity - CEPA Toolkit	United Nations (through the Convention on Biological Diversity)	Croatia, France, Greece, Italy, Montenegro, Portugal, Slovenia, Spain	UN Environment Programme	Nagoya protocol on access to genetic resources and the fair and equitable sharing of benefits arising from their utilisation to the convention on biological diversity.	This Protocol was adopted at the tenth meeting of the Conference of the Parties on 29 October 2010 in Nagoya, Japan. It reaffirms the sovereign rights of States over their natural marine biological resources and acknowledging the linkage between access to marine genetic resources and the fair and equitable sharing of benefits arising from the utilization of such resources. By promoting the use of…	Strategies and Policy Management	All sectors	NA		https://www.cbd.int/abs/
51	Communication through CEPA Toolkit for Nagaya Protocol	United Nations (through the Convention on Biological Diversity)	Croatia, France, Greece, Italy, Montenegro, Portugal, Slovenia, Spain	UN Environment Programme	CEPA stands for Communication, Education and Public Awareness. It is important to implement a mutualized and efficient communication strategy recognizing that there is a growing public awareness of the economic value of ecosystems and biodiversity. Sharing the fair and equitable economic value with the custodians of biodiversity (stakeholders, politics)	This toolkit on communication, education and public awareness (CEPA) including considerations for access and benefit-sharing (ABS) contains methodologies, tips, checklists, case models and other materials to help parties and stakeholders develop innovative awareness-raising strategies to communicate about biodiversity-related issues, and in particular access and benefit-sharing. The toolkit conta…	Marketing - Branding	All sectors	NA		https://www.cbd.int/abs/doc/cepa-toolkit-en.pdf
52	NEPTUNE Blue Growth Accelerator	NEPTUNE consortium	France, Greece, Italy, Spain	H2020 /Innovation action project	NEPTUNE implemented a Blue Growth Accelerator supporting the development of new cross-sectoral and cross-border industrial value-chains mixing Water, Aerospace, ICT and Agriculture technologies through a direct support scheme to SMEs.	NEPTUNE stands for New Cross Sectoral Value Chains Creation across Europe Facilitated By Clusters for SMEs’ Innovation in Blue Growth. Neptune accelerator relied on an innovative and collaborative platform to support the emergence of cross-sectoral and cross-border solutions developed by SMEs as well as on a toolkit toa ccompany and financially support SME innovative projects. This toolkit includ…	Business creation	All sectors	NA		http://www.neptune-project.eu/
53	Plan Littoral 21	France	France	Regional Council Occitanie	The Occitanie Region, in collaboration with the French State and the Caisse des dépôts et consignation (CDC), has developed the Plan Littoral 21 whose aim is to support the modernisation and the balanced development of Mediterranean costal areas.	Three main challenges have to be addressed by the Plan Littoral 21: make Occitanie an example of ecological resilience, make the Occitanie maritime economy innovative all over the territory and be a symbol of attractiveness, welcome and living together. This plan is seen has a driver for innovation and wish to develop ambitious projects implemented mainly by public authorities in Occitanie. In 20…	Strategies and Policy Management	All sectors	NA		https://www.laregion.fr/IMG/pdf/de_pliant_a4_plan_littoral_21-stc-hd.pdf
54	Association France Microalgues (French National Microalgae Association)	France	France		France Microalgues brings together the main producers and processors of microalgae in France.	The objective of this association is to promote the microalgae values: naturalness, well-being, quality for health and respect for the environment. In addition to services such as market, product, competitiveness and technology monitoring, the association has the following functions: to support innovation and to bridge the gap between markets and scientists, laboratories, research centers and uni…	Collaborative Innovation- Networking- Clusters- Knowledge Platforms	Aquaculture	NA		https://www.francemicroalgues.fr/
55	The BioTech Nursery of Grand Luminy Biotech	Grand Luminy Technopole, Marseille (France)	France		The Biotehc Nursery of Grand Luminy Biotech is an incubator dedicated to business development in the sector of Life Sciences.	The site proposes: - Customizable laboratories lots and offices adapted to the researchers and company needs - Platforms and pooled services dedicated to biotechnologies - Consulting services to assist the development of start-up	Business creation	All sectors	NA		https://www.grandluminy.com/en/content/biotech-nursery
56	AQUAculture infrastructures for EXCELlence in European fish research towards 2020 (2015-2020)	INRA coordinator -international consortium	France, Greece, Portugal, Spain	Horizon 2020 research infrastructure project	AQUAEXCEL2020 aims to support the sustainable growth of the aquaculture sector in Europe and to foster advanced integration and standardisation of tools for aquaculture research	The project helped integrating 39 top class European aquaculture research facilities that cover all relevant scientific fields, fish species and systems. AQUAEXCEL2020 provided subsidised access to its top-class aquaculture facilities as well as numerous highly pertinent services for researchers from academia and industry (training, calls for transnational access...).	Collaborative Innovation- Networking- Clusters- Knowledge Platforms	Aquaculture	NA		https://www.aquaexcel2020.eu/
57	VASCO II	Leader : GPMM (Port of Marseille) Research partners : IFREMER, CEA CADARACHE, CEA GRENOBLE Industrial partners: KemOne, Arcelor Mittal , Solamat Merex, Lyondell Bassell , Coldep , Inovertis , Heliopur Technologies	France	National - ADEME	Biovalorisation of CO2 by culture of marine microalgae. Supply of biorefinery raw materials to the green chemistry markets.	This project follows VASCO 1 project, which aimed to demonstrate the feasibility of biovalorisation of high-CO2 industrial gases from industrial activities in Fos-sur-Mer by cultivating microalgae in open spaces. The scientific feasibility study was conducted between 2011 and 2012 by IFREMER Palavas, based on an experimental demonstrator of 10 m2 using pure CO2. Based on the results of this exper…	Technological support	Aquaculture	2.Technology concept		NA
								Environment
58	Microalgae incorporation into healthy food products	Grad hrane d.o.o.	Croatia	ERDF- structural funds Croatia	Incorporation of microalgae extracts into bakery products		Technological support	Aquaculture	6. Technology demonstrated in relevant environment	Yes
59	Spectrometric technology and methodology prototype for preventative oyster quality assessment on-site	Benco Baltic d.o.o. - Croatia UAB Art 21 - Lithuania Spectrometric technology and methodology prototype for preventative oyster quality assessment on-site - Lithuaina	Croatia	EUREKA / OWN	The project aims to develop and demonstrate in operational environment a technology prototype for preventative oyster quality assessment on-site, by combining near-infrared spectrometry (NIR) with machine learning and advanced data analysis techniques	During the project a technology prototype for the determination and estimation of protein, glycogen, fat and moisture concentrations in oysters will be developed, based on NIR spectroscopy and machine learning data analysis algorithms. The technology will include an accurate and detailed methodology for oyster sample preparation, hardware technical parameters description and specifications needed…	Technological support	Aquaculture	7. System prototype demonstration in operational environment
								Environment
60	Production of vaccines for adriatic fish	Croatian Veterinary Instutute	Croatia	EU	Use of effective vaccines for sensitive fish we one eliminate loses in fish food production, addressing food industry concerns.	Aim is to prevent fish pathologies. Challenges addressed are reccurent fish infections with 2 different bacteria. This practise should keep fish healthy. This practice will minimise the need to use antibiotcs for fish and improve the fish for food quality.	Technological support	Aquaculture	5. Technology validated in relevant environment
61	Production of probiotics for adriatic fish - ADRIAQUANET	The Institute of Oceanography and Fisheries	Croatia, Italy	EU	Use of probiotics for fish one can maintaine fish good health and quality.	Aim is to maintaine fish health. The challenge addressed is fish disbiosis which contributes to poor fish health. This practice improve overall fish quality and thus preserve marine ecosystem and fish for food quality.	Technological support	Aquaculture	5. Technology validated in relevant environment
62	CyanoCare	i3S - Institute for Research and Innovation in Health; PORTUGAL	Portugal	government budget funds and ERDF (FCT, EIT Health Porto, etc)	CyanoCare aims to develop added-value products based on cyanobacteria. CyanoCare products will all have origin in cyanobacteria, which have several competitive characteristics: high growth rate, low nutritional requirements (sunlight, air, water and inorganic nutrients) resulting in low-cost production, high source of compounds with industrial interest (e.g. polymers, biomass, pigments), and are …	CyanoCare's objective is to develop added-value products based on cyanobacteria to replace the daily use of synthetic compounds. Nowadays, the global awareness of the risks of using recalcitrant petroleum-based materials/plastics is increasing dramatically. Therefore, novel solutions are mandatory in order to reduce the use of these synthetic polymers with high ecological footprint that cause a n…	Technological support	Cosmetics	4. Technology validated in lab		Interviews
63	Allmicroalgae	Allmicroalgae Natural Products S.A.;PORTUGAL	Portugal	own funds and ERDF	One of the largest European producers of microalgae, the Portuguese company Allmicroalgae – Natural Products S.A. is a leader in premium-quality microalgae biomass, food safety and innovation. The company’s production plant, which employs more than 30 highly specialized people, is located in Leiria, Portugal, from where it delivers microalgae solutions for dietary supplements, food, feed and agro…	Portuguese microalgae producer, Allmicroalgae was initiated from a sustainable project from Secil, one of Portugal’s largest cement companies, back in 2007. The project intended to fixate the CO2 originated from the cement industry by microalgae. The first 3 years involved R&D activities to understand the potential of the project, focusing on the laboratory and pilot-scale experiments. 2013 marke…	Technological support	Aquaculture	9. Actual system proven in operational environment		literature review
								Nutraceuticals
								Feed Industry
								Environment
64	GreenCoLab	PORTUGAL CCMAR - Centro de Ciências do Mar LNEG - Laboratório Nacional de Energia e Geologia University of Algarve Allmicroalgae – Natural Products, S.A. Necton – Companhia Portuguesa de Culturas Marinhas S.A. Algaplus – Produção e Comercialização de Algas e seus Derivados, Lda SPAROS, Lda	Portugal	government budget funds (coLAB base funding)	GreenCoLab is a non-profit private organization, a collaborative platform between research and industry, whose research & innovation agenda is based on the exploration of micro- and macroalgae as an essential component for the food, feed, nutraceutical, bioenergy, wastewater and cosmetic industries.	GreenCoLab is a platform that congregates academia and industry, that was granted the title of «Collaborative Laboratory» by the Portuguese Science and Technology Foundation. It is therefore formally recognized as an R&D institution and is part of the national science and technology system, in accordance with the Portuguese Science Law. GreenCoLab is composed of one research centre (CCMAR), one s…	Collaborative Innovation- Networking- Clusters- Knowledge Platforms	All sectors			literature review
65	Participatory model for the sustainable management of marine and coastal resources and for cross border habitats, biodiversity and ecosystem services safeguard (BLUELAND)	Agjencia Kombëtare e Zonave të Mbrojtura, në Shqipëri (AL); Instituti për Ruajtjen e Natyrës në Shqipëri (AL) Ministarstvo poljoprivrede i ruralnog razvoja Crne Gore (ME) Univerzitet Crne Gore (ME) Centre International de Hautes Etudes Agronomiques Méditerranéennes - Istituto Agronomico Mediterraneo di Bari (IT) Istituto Cooperativo di Ricerca (IT); Agenzia Italiana per la Cooperazione allo Svilu…	Italy, Montenegro	IPA INTERREG ITA-ALB-CG	The main goal of the project BLUE LAND is to develop and implement a participatory and ecosystem-based model for the protection and safeguard of marine and coastal resources, habitats, biodiversity and ecosystem services.	The main goal of the project BLUE LAND is to develop and implement a participatory and ecosystem-based model for the protection and safeguard of marine and coastal resources, habitats, biodiversity and ecosystem services. This model will represent a form of management comparable to that of a Marine Protected Area, with the added benefit of a broader ownership of the goals within the local communi…	Strategies and Policy Management	Environment			Information on this initiative was collected from the University of Montenegro by acessing project database of the Institute for Marine Biology. Upon that, we acessed the web site of the project for additional information: https://blueland.italy-albania-montenegro.eu/
66	HORIZONTAL COMMUNICATION AND CAPITALIZATION PROJECT FOR INNOVATION IN BLUE GROWTH AT MEDITERRANEAN LEVEL - InnoBlueGrowth	CoNISMa – Consorzio Nazionale Interuniversitario per le Scienze del Mare and project partners: National Interuniversity Consortium for Marine Sciences (CoNISMa) Association of Mediterranean Chambers of Commerce and Industry (ASCAME) Intermediterranean Commission of the Conference of Peripheral Maritime Regions (CPMR) Plan Bleu National Technical University of Athens (NTUA) University of Montenegr…	France, Greece, Italy, Montenegro, Spain	INTERREG MED	The objective of InnoBlueGrowth is to increase transnational activity of innovative clusters to develop smart and sustainable growth in the Mediterranean area. InnoBlueGrowth’s main objective is to ensure the communication and capitalization activities of the “modular” projects (studying, testing and capitalizing projects) dealing with Blue Growth issues in order to increase their impacts towards…	InnoBlueGrowth project, coordinated by the CoNISMa – Consorzio Nazionale Interuniversitario per le Scienze del Mare, is one of six Horizontal Projects approved from the first call of the Interreg Med programming period 2014-2020. The objective of InnoBlueGrowth is toincrease transnational activity of innovative clusters to develop smart and sustainable growth in the Mediterranean area. InnoBlueGr…	Collaborative Innovation- Networking- Clusters- Knowledge Platforms	All sectors			Information on this initiative was collected from the University of Montenegro by acessing project database of the Institute for Marine Bology. Upon that, we acessed the web site of the project for additional information: https://planbleu.org/en/projects/innobluegrowth/
67	Advancing marine conservation in the European and contiguous seas (MARCONS)		Croatia, France, Greece, Italy, Montenegro, Portugal, Slovenia, Spain	COST Action	The aim is to consolidate a network of scientists and stakeholders who are involved in marine conservation in European and contiguous seas, by developing and promoting novel and relevant concepts, to the related European policies, and enable effective and informed decision-making for the improvement of marine conservation in the European Seas and adjacent regions.	Marine biodiversity in the European Seas is under threat due to the intensity of cumulative human impacts. Despite the high-level goals to halt the loss of biodiversity and ecosystem services by 2020, there are no signs of improved trends in the state of biodiversity. Most services derived from marine and coastal ecosystems are being used unsustainably and therefore marine ecosystems are deterior…	Collaborative Innovation- Networking- Clusters- Knowledge Platforms	Environment			Information on this initiative was collected from the University of Montenegro by acessing project database of the Institute for Marine Bology. Upon that, we acessed the web site of the project for additional information: http://www.marcons-cost.eu/
68	Marine microalgae immunostimulant complex to boost the competitiveness of the EU aquaculture sector (ALGABOOSTER)	BUGGYPOWER SL/ SPAIN	Spain	International/EU	Development of complex additives based on marine microalgae with immunostimulant properties for their incorporation as functional ingredients in diets used in the aquaculture sector. The value chains adressed by ALGABOOSTER are: production fo algae for high value compouns and both related to acuaculture	The development of additive complex to be used in European aquaculture and make more sustaineble and competitive. European aquaculture is a growing sector, of great importance to the EU economy, but it must improve its competitiveness by increasing, among other things, the effectiveness and sustainability of fish feed. The aim of the ALGABOOSTER project is to help make the European aquaculture se…	Technological support	Aquaculture	9. Actual system proven in operational environment	Yes	Literarute review & inteview Best practices developer. Link: http://www.buggypower.eu/what/
								Feed Industry
69	Creation of innovative products from aquaculture and fishery discards (CREA&MAR)	"Chef del Mar" Gastronomic Research Laboratory SPAIN	Spain	National	CREA&MAR is a cooperative experimental development initiative aimed at obtaining new commercial products from aquaculture fish, and from discards of both fish and by-products of aquaculture and processed fish products focused in Andalusia (Spain).cosmetics markets.	CREA&MAR's objective is the development of new processed products from aquaculture and discarded species, through innovation in their processing and the development of new forms of presentation that allow the product to be differentiated in markets at an international level. The partnershisp of CREA&MAR is composed of 6 companies (ABELLÓ LINDE S.A.U., COMERCIAL ANGULAS DE TREBUJENA S.L., PIGMEA S…	Marketing - Branding	Aquaculture			Literature review: https://www.aponiente.com/wp-content/uploads/2019/04/creamar.pdf
70	Experimental development of a green filter for the purification of the effluents of the "El Albujón" wadi using native consortiums of microalgae (RAMBLA)	BUGGYPOWER/ SPAIN	Spain	International	To use native microalgae to generate a green filter that reduces the organic and anthropic pollution produced mainly by agriculture and tourist activities in the Mar Menor area.The best practitice adresses the environment field.	RAMBLA is an initiative aimed at the research and experimental development of a “green filter” system that would serve to purify contaminated effluents from the El Albujón watercourse (Mar Menor area in Murcia Region), using local microalga consortia. The contribution of the nutrients contained in these effluents is one of the main causes of the eutrophication of the Mar Menor, the largest salty …	Technology transfer	Environment	8. System complete and qualified		Literarute review- Link: http://www.buggypower.eu/blog/research-and-experimental-development-of-green-filter-for-the-depuration-of-the-el-albujon-watercourse-effluents-by-using-native-microalgae-consortia/
71	PHAGETHERAPY	Microbial Biotechnology Group. UMU/SPAIN	Spain	National	The increased resistance of bacterial pathogens to antibiotics is promoting the use of alternatives for the treatment of bacterial diseases. Viruses that prey bacteria are named bacteriphages (or phages for short) are considering a promising strategy that has shown experimentally its applicability in aquaculture.	Phages are highly specific for their host. Accordingly, phages infecting bacterial pathogens of fishes will control these microorganisms while not affecting any other microorganism. Most importantly, they will not promote bacterial resistance to the antibiotics used for the treatment of human infections.	Technological support	Aquaculture	5. Technology validated in relevant environment		Literature review: https://www.mdpi.com/2079-6382/9/6/301
72	YONDELIS (development of innovative drugs through marine organisms)	PHARMAMAR, SPAIN	Spain	National	APLIDIN is an anticancer agent of marine origin, originally obtained from the ascidian Aplidium albicans.	APLIDIN specifically binds to the eEF1A2 and targets the non-canonical role of this protein, resulting in tumor cell death via apoptosis (programed death). Plitidepsin is approved Australia for the treatment of multiple myeloma, and it has received orphan drug designation in the European Union and the United States of America. Clinical studies with Lurbinectedin in clinicaltrials.gov and in clini…	Technology transfer	Pharmaceuticals	9. Actual system proven in operational environment	Yes	Literarute review. Link: https://pharmamar.com/science-and-innovation/oncology-pipeline/?lang=en
73	Treatment of beer by-products to minimise environmental impact and develop aquaculture fish feed (PIPECES)	Estrella de Levante / SPAIN	Spain	National	Pipeces is an initiative leds by Estrella de Levante, which also includes two other companies, in addition to the Spanish Institute of Oceanography (IEO) and the University of Murcia (UMU). It favours innovation in the circular and blue economy through the use of by-products used in the manufacture of beer and which are integrated into fish feed and used in aquaculture. It is an initiative that p…	The objective of PIPECES is to obtain a treatment of the brewery's by-products in order to minimise the environmental impact of this waste, through a study of the components to be incorporated in aquaculture fish feed.	Technology transfer	Aquaculture	8. System complete and qualified		Literarute review: Link: https://www.um.es/documents/3456781/8299643/Presentacion-Juan-Antonio-Lopez-Abadia.pdf/9bc6de11-a019-4aa4-89a9-0cf0f0f67594
								Feed Industry
74	Algaes to save the world	The Blue Future, SPAIN	Spain	International	Use of Blockchain to geo-locate, validate and manage an own DAO (digital decentralized autonomous organization) and generate tokens with interchangeable value in the different existing algae markets under the name of BLUE BONDS.	The objective is to give visibility to the agents involved in algae culture all over the world: institutions, fish farmers, investors, suppliers, researchers and distributors.	Marketing - Branding	Aquaculture		Yes	Literarute review. Link: http://thebluefuture.org
75	VALORISATION OF THE INVASIVE ALGAE RUGULOPTERYX OKAMURAE	Instituto de Investigación y Formación Agraria y Pesquera, SPAIN	Spain	National	The coasts of Malaga and Cadiz are being invaded by this exotic algae and it is affecting the viability of fishing and tourism. A solution to the problem is being sought through research into the possibility of exploiting the biomass produced by the algae and researchers from the aquaculture and marine resources area of IFAPA are participating. The solution is to use the biomass as agricultural c…	The general objective is the taxonomic identification and genetic characterisation of the R. okamurae algae, the identification of abiotic and biological factors that help to identify the causes of the presence of this algae on the Andalusian coasts and its possible evolution, and finally the analysis of control measures based on the valorisation of the biomass and biocontrol.	Technological support	Aquaculture	5. Technology validated in relevant environment		Literature review: http://www.lifeinvasaqua.com/otras-eei-andalucia-validara-en-abril-que-el-alga-invasora-rugulopteryx-okamurae-se-pueda-usar-para-compost-agricola/
								Environment
76	REBECA: NETWOK OF EXCELLENCE IN BLUE BIOTECHNOLOGY	Fundación Canaria Parque Científico Tecnológico de la Universidad de Las Palmas de Gran Canaria (Spanish Algae Bank)	Portugal, Spain	International	REBECA is a territorial development and cooperation platform created to promote Blue Biotechnology within the geographical area of the Macaronesian region and Northwest Africa.	The objective of REBECA is to create a network and bring together culture collections, R&D centres and the Administration with the mission of conserving and enhancing Biodiversity and to serve as an embryo for the development and implementation of an innovative industry based on the culture of microalgae and cyanobacteria that will be an economic engine and the improvement of the quality of life …	Collaborative Innovation- Networking- Clusters- Knowledge Platforms	ALL SECTORS			Literature review: https://proyectorebeca.eu/#block3
77	ZepzelcaTM (lurbinectedin: development of innovative drugs through marine organisms)	PHARMAMAR, SPAIN	Spain	National	Zepzelca (lurbinectedin), also known as PM1183, is an analog of the marine compound ET-736 isolated from the sea squirt Ecteinacidia turbinata in which a hydrogen atom has been replaced by a methoxy group.	Zepzelca is a selective inhibitor of the oncogenic transcription programs on which many tumors are particularly dependent. Together with its effect on cancer cells, lurbinectedin inhibits oncogenic transcription in tumor-associated macrophages, downregulating the production of cytokines that are essential for the growth of the tumor. Transcriptional addiction is an acknowledged target in those di…	Technology transfer	Pharmaceuticals	9. Actual system proven in operational environment	Yes	https://pharmamar.com/science-and-innovation/oncology-pipeline/?lang=en
78	Applied Blue Biotechnology Master	Catholic University of Valencia (in Spain)	Spain	International	Blue Biotechnology Master for a Blue Career is a project funded by the EU and launch the Master that has been co-designed with industry and fosused on Blue Biotechnologies.	The Master will provide knowledge and skills for jobs in the health, nutrition and aquaculture domains and will include strong elements of work-based training. The Master will be accessible to workers through lifelong learning schemes and mentoring opportunities. The participating countries are France, Spain, UK and Portugal.	OTHER -Training - Access to jobs	ALL SECTORS			Literature review: https://www.bbmbc.eu
79	GHANA: The Genus Haslea, New marine resources for blue biotechnology and Aquaculture	UNIVERSITE DU MANS / FUNDACION CANARIA PARQUE CIENTIFICO TECNOLOGICO DE LA UNIVERSIDAD DE LAS PALMAS DE GRAN CANARIA	France, Greece, Spain	International	THE GHANA PROJECT WIL EXPLORE NEW MARINE BIORESOURCES FOR BLUE BIOTECHNOLOGY APPLICATIONS IN AQUACULTURE, COSMETICS AND FOOD AND HEALTH INDUSTRY BASED ON HASLEA DIATOMS.	The GHaNA project aims to explore and characterize a new marine bioresource, for blue biotechnology applications in aquaculture, cosmetics and possibly food and health industry. The project will determine the biological and chemical diversity of Haslea diatoms to develop mass-scale production for viable industrial applications by maximising biomass production and associated high-value compound pr…	Technological support	Cosmetics	4. Technology validated in lab		Literature review: https://cordis.europa.eu/project/id/734708 / http://ghana.univ-lemans.fr/en/index.html
								Nutraceuticals
								Pharmaceuticals
								Feed Industry
								Aquaculture
80	PRODUCTION OF HEALTHY MICROALGAE BIOCOMPOSITES WITH FOOD APPLICATIONS - AlgaeForHealthyWorld (A4HW)	University of Cadiz/ CSIC / "Chef del Mar" Gastronomic Research Laboratory	Spain	National	Algae For Healthy World, "A4HW" seeks to produce high value-added food products, which serve as functional foods useful in the culinary, food and industrial sectors. This project is in line with the "Blue Growth" policy of the EU's H2020 programme, which aims to create sustainable growth in the marine and maritime economy, inter alia to create measures to develop technologies that respect the env…	The aim of the Algae for Healthy World (A4HW) project is to develop the biotechnological tools necessary to improve and optimise the production of biomass, as well as to increase the concentration of high added value biocomposites for the human food sector (mainly pigments-antioxidants) from different microalgae, focusing its developments on different strains of Spirulina, Nannochloropsis gaditan…	Technological support	Aquaculture	4. Technology validated in lab		Literature review: https://www.aponiente.com/wp-content/uploads/2019/04/proyecto-A4HW.pdf / http://cib.csic.es/project/production-healthy-biocompounds-microalgae-food-applications-algaeforhealthyworld-a4hw
								Nutraceuticals
								Feed Industry
81	MACBIOBLUE: NUEVOS PRODUCTOS Y PROCESOS EN EL AMBITO DE LA BIOTECNOLOGIA AZUL DE LA MACARONESIA	Technology Institute of canary Islands, SPAIN	Spain	International	MACBIOBLUE is a demonstration and technology transfer project to help companies develop new products and processes in the field of Blue Biotechnology of the Macaronesia.	The objective is to develop demonstration actions that help companies to develop and implement technologies, products and processes in the field of blue biotechnology (focused on algae). It is intended that native species of microalgae (Isochrysis galbana, Dunaliella tertiolecta, Dunaliella salina, Tetraselmis striata and Navicola salinicola) and macroalgae (Lobophora variegata and Cystoseira abi…	Collaborative Innovation- Networking- Clusters- Knowledge Platforms	ALL SECTORS			Literature review: https://macbioblue.com/el-proyecto/breve-resumen-del-proyecto/
82	BIOSEA: Exploiting algae and other aquatic biomass for production of molecules for pharma, nutraceuticals, food additives and cosmetic applications	AITEX ASOCIACION DE INVESTIGACION DE LA INDUSTRIA TEXTIL, SPAIN	Spain	International	BIOSEA is an innovative cost-effective technology for maximizing aquatic biomass-based molecules for food, feed and cosmetic applications.	The overall objective of BIOSEA is the development and validation of innovative, competitive and cost-effective upstream and downstream processes for the cultivation of 2 cyanobacteria/microalgae (Spirulina platensis and Isochrysis galbana), and 2 macroalgae (Ulva intestinalis and Saccharina latissima). The aim to produce and extract at least 6 high value active principles at low cost (up to 55% …	Technological support	Aquaculture	6. Technology demonstrated in relevant environment		Literature review: https://biosea-project.eu
								Nutraceuticals
								Feed Industry
								Cosmetics
83	Maritime Strategy of Catalonia. Strategic Plan 2021 -2030	GOVERNMENT OF CATALONIA	Spain	Regional	In December 2016, Catalonia approved, by means of a Government Agreement, the creation of the Generalitat's Maritime Action Programme, which aims to establish its own maritime policy in order to meet the challenges of developing the blue economy in a sustainable and harmonious manner, through the integrated management of sectoral activities related to the marine and maritime environment.	The objective of the strategy and of Catalonia is to fully develop the blue economy potential of its maritime space and to guarantee social and territorial balance, based on resilient, biodiverse and fully functional ecosystems that generate the highest quality services to society. This includes the priorities of science and innovation in all sectors related to the blue economy and how to carry o…	Strategies and Policy Management	ALL SECTORS			Literature review. Link: http://agricultura.gencat.cat/web/.content/08-pesca/politica-maritima/enllacos-documents/fitxers-binaris/ESTRATEGIA-MARITIMA-2030_Pla-2018-2021_ES.pdf
84	MedAID: Mediterranean Aquaculture Integrated Development	Mediterranean Agronomic Institute of Zaragoza (IAMZ- CIHEAM), SPAIN	Croatia, France, Greece, Italy, Portugal, Spain	EU	The goal of MedAID is to increase the overall competitiveness and sustainability of the Mediterranean marine fish-farming sector, throughout the whole value chain	The objectives of MedAId are: -To make an integrated assessment of the sector so as to identify the main challenges conditioning sustainability. - To generate innovative knowledge of the technical, environmental, economic and social issues that are currently faced by the sector. - To develop tools to improve the performance of the production systems, create added value products, and draw up socia…	Collaborative Innovation- Networking- Clusters- Knowledge Platforms	Aquaculture			Literature review: http://www.medaid-h2020.eu
85	PerformFISH: Integrating Innovative Approaches for Competitive and Sustainable Performance across the Mediterranean Aquaculture Value Chain	University of Thessaly, GREECE	Croatia, France, Greece, Italy, Portugal, Spain	EU	PerformFISH works to ensure sustainable growth of the Mediterranean aquaculture industry, based on consumer perceptions and real market requirements. It aims to support fish farms that operate not only in ideal economic and environmental conditions but also in a socially and culturally responsible manner.PerformFISH is unique in its direct access through the fish farming associations to Third Par…	PerformFISH has the direct support and endorsement of the Mediterranean Marine Fish Farming (MMFF) industry, with producers’ associations from Greece, Spain, Italy, France and Croatia directly involved as partners in the project. Their membership represents 92.8% of all sea bream and sea bass production in the EU. Their involvement will ensure that the needs of the sector are met and knowledge is…	Collaborative Innovation- Networking- Clusters- Knowledge Platforms	Aquaculture			Literature review: http://performfish.eu/project-overview/
86	European University for Smart Urban Coastal Sustainability (EU‐CONEXUS)	Catholic University of Valencia / SPAIN	Croatia, France, Greece, Spain	EU	EU-CONEXUS was created in the framework of the European universities’ initiative. This programme is led by the European Commission and was created to strengthened strategic partnerships across Europe and develop international competitiveness of European universities. Therefore, European University for Smart Urban Coastal Sustainability (EU‐CONEXUS) is an European transnational higher education an…	EU‐CONEXUS has chosen a focus on urban and semi‐urban coastlines because they are increasingly densely populated areas and very important for trade, aquaculture and fisheries, energy, tourism. At the same time, these coastlines are the most vulnerable areas with regard to the consequences of climate change. Universities and research institutions have a central role to play in promoting the “Blue …	Collaborative Innovation- Networking- Clusters- Knowledge Platforms	ALL SECTORS			Literarute review and interview BP developer: Link: https://www.eu-conexus.eu/en/home/about-us/mission-and-vision/
87	Strategy for Innovation and Business Competitiveness of the Region of Murcia ( Innovation Accelerator)	REGION OF MURCIA GOVERNMENT	Spain	Regional	In a strategy to promote innovation and business compatibility in the region of Murcia where the sectors related to the blue bio-economy and blue growth are included (such as aquaculture, fishing, blue biotechnology, coastal tourism, agro-food value chains, etc) is aligned with both the Science, Technology and Innovation as with the Regional Strategic Plan and includes a set of measures and actio…	The main objectives and lines are to improve technology and knowledge transfer between research organisations and enterprise; promote the culture of innovation in the broad sense (technological and non-technological innovation); encourage the training and improvement of human resources in enterprises as the best guarantee of the sustainability of innovation processes in enterprises; and strengthe…	Business creation	ALL SECTORS			Literarute review. Link: https://www.institutofomentomurcia.es/web/portal/sistematizacion-de-la-gestion-de-la-innovacion
88	MACUMBA: Marine Microorganisms: Cultivation Methods for Improving their Biotechnological Applications	PHARMAMAR in SPAIN	France, Italy, Portugal, Spain	EU / FP7	Development of cultivation methods of marine microorganims for improving their Biotechnological Applications. Marine microorganisms form an almost untapped resource of biotechnological potential. However, its use is hindered by the low success rate of isolation of novel microorganisms and often by poor growth efficiency. Hence, the vast majority of marine microorganisms has not been cultivated an…	MaCuMBA aims at improving the isolation rate and growth efficiency of marine microorganisms from conventional and extreme habitats, by applying innovative methods, and the use of automated high throughput procedures. The approaches include the co-cultivation of interdependent microorganisms, as well as gradient cultures and other methods mimicking the natural environment, and the exploitation of …	Technological support	Industrial processes : enzymes, catalizers etc	6. Technology demonstrated in relevant environment		Literarute review. Link: https://www.macumbaproject.eu / https://www.macumbaproject.eu/macumba-consortium-19
89	Science, Technology and Innovation Plan of the Region of Murcia	REGION OF MURCIA GOVERNMENT	Spain	Regional	In 2003, the Autonomous Community of the Region of Murcia formally began planning public action on the ground of science and technology and therefore, the Plan is the instrument that the law 8/2007 of 23 April on the promotion and coordination of research, technological development and innovation of the Autonomous Community of the Region of Murcia and blue economy and blue growth sector is includ…	The main objective is to carry out in a coordinated and effective way the planning, management and execution of the Regional Policy of R+D+i. The Science, Technology and innovation Plan of the Region of Murcia is the instrument for the articulation and construction of the scientific-technological and innovation policy of the Region of Murcia. It also enables the coordination of research between t…	Strategies and Policy Management	ALL SECTORS			Literarute review. Link: https://www.carm.es/web/pagina?IDCONTENIDO=3822&IDTIPO=11&RASTRO=c563$m4224
